# Supplementary material for: Environmental Resistance and Fatigue Behaviors of Epoxy/Nano-Boron Nitride Thermally Conductive Structural Film Adhesive Toughened by Polyphenoxy
Source: MDPI journal article supplement (doi:10.3390/polym13193253), 2021-09-24
Supplement: s1 [file s1]

## ***Supplementary materials***

### **Environmental resistance and fatigue behaviors of epoxy/nano-boron nitride thermally conductive structural film adhesive toughened by polyphenoxy**

**Cheng'e Yue<sup>1,2</sup>, Shaobo Dong<sup>1</sup>, Ling Weng<sup>2,\*</sup>, Yazhen Wang<sup>1</sup> and Liwei Zhao<sup>3,\*</sup>**

<sup>1</sup> Heilongjiang Province Key Laboratory of Polymeric Composition Material, School of Materials Science and Engineering, Qiqihar University, Qiqihar 161006, P.R.; yuece0219@qqhru.edu.cn (C. Yue); dongshaobo@qqhru.edu.cn (S. Dong); wyz6166@163.com (Y. Wang)

<sup>2</sup> School of Materials Science and Chemical Engineering, Harbin University of Science and Technology, Harbin 150040, P.R. China; wengling79@163.com (L. Weng)

<sup>3</sup> Institute of Petrochemistry, Heilongjiang Academy of Sciences, Harbin 150040, China; zhaoliwei0130@163.com; zhaoliwei0130@hit.edu.cn (L. Zhao)

\* Correspondence: wengling79@163.com (L. Weng); zhaoliwei0130@163.com and zhaoliwei0130@hit.edu.cn (L. Zhao)

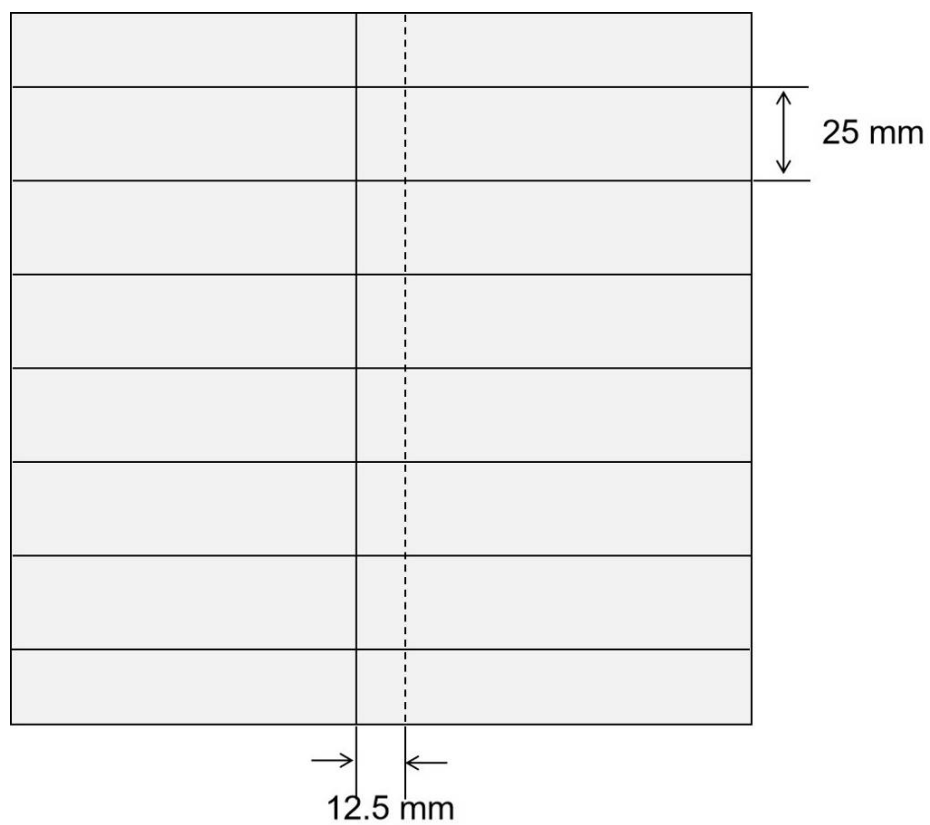

Figure S1. Schematic diagram of the adhesive bonded aluminum plates.

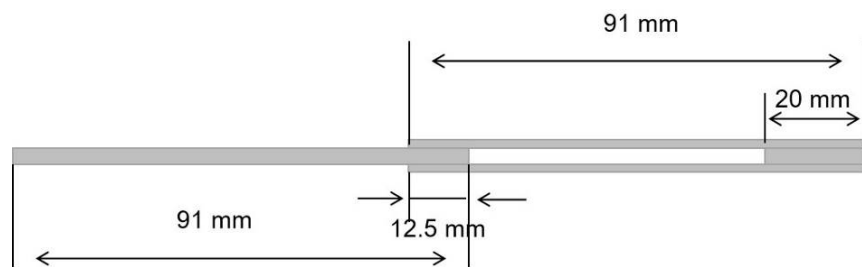

Figure S2. Size of double-lap shear specimen.

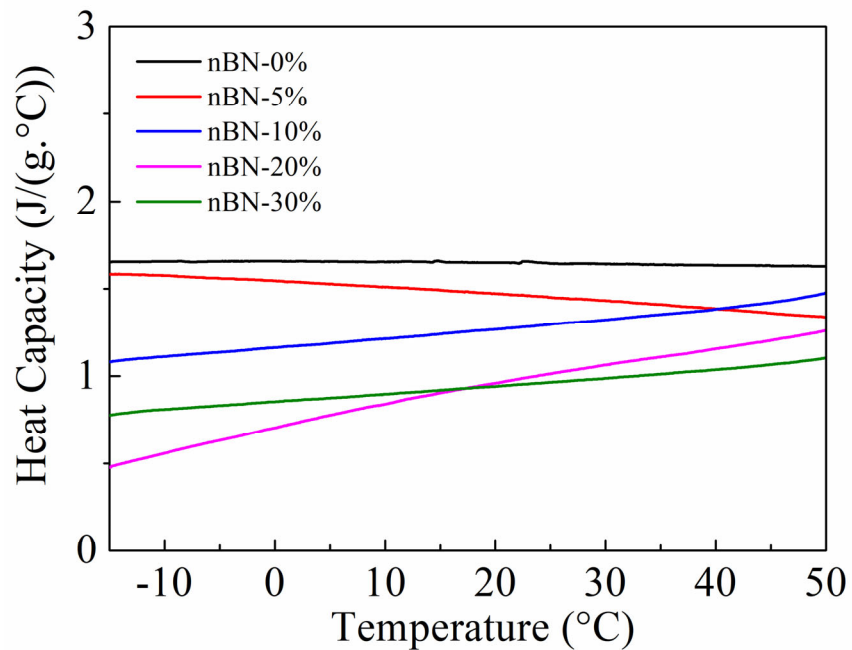

Figure S3. The heat capacity curve of the modified adhesive system.

Table S1. Heat capacity, thermal diffusivity, density and thermal conductivity of the modified adhesive system.

| Sample  | $C_p$ (J/(g °C)) | $\alpha$ (cm <sup>2</sup> /s) | $\rho$ (g/cm <sup>3</sup> ) | $\kappa$ (W/mK) |
|---------|------------------|-------------------------------|-----------------------------|-----------------|
| nBN-0%  | 1.644            | 0.0010                        | 1.30                        | 0.22            |
| nBN-5%  | 1.451            | 0.0014                        | 1.33                        | 0.27            |
| nBN-10% | 1.291            | 0.0020                        | 1.35                        | 0.35            |
| nBN-20% | 1.009            | 0.0035                        | 1.40                        | 0.50            |
| nBN-30% | 0.963            | 0.0047                        | 1.44                        | 0.65            |

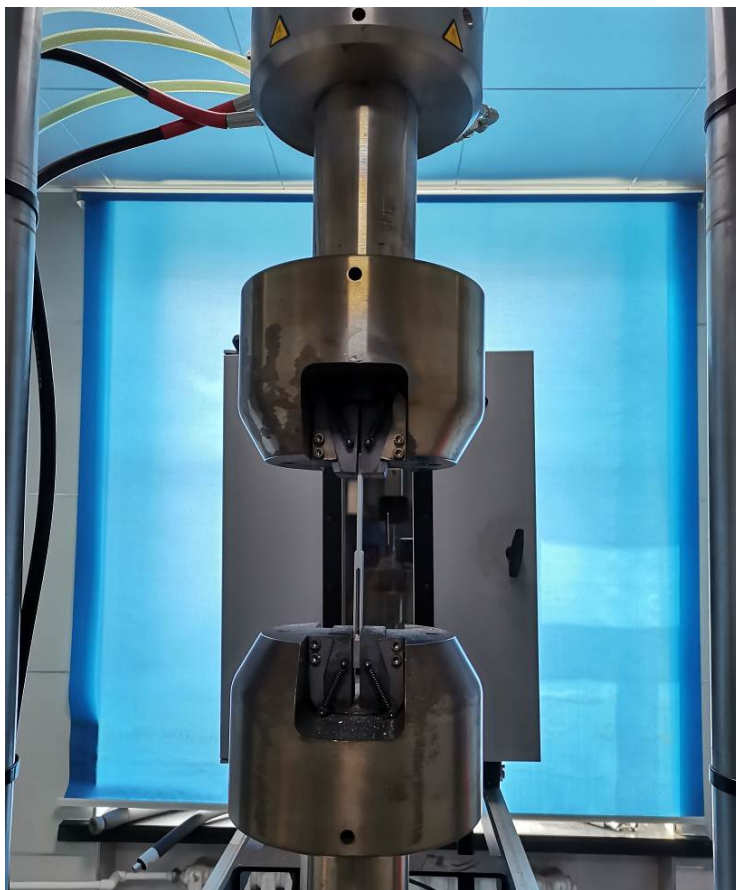

Figure S4. The fatigue test equipment.

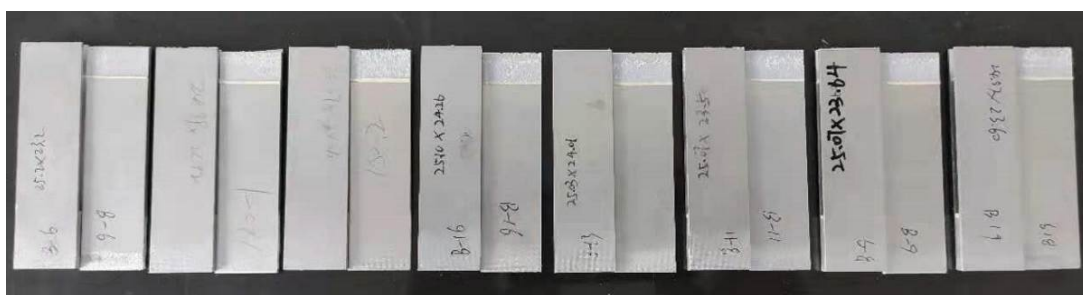

Figure S5. Photos of failed samples.
